# Supplementary material
Source: Springer Nature journal article supplement (https://www.springermedizin.de/resource/supplementary/13019_2010_368_MOESM1_ESM.pdf/9638634)

### Cardiac output

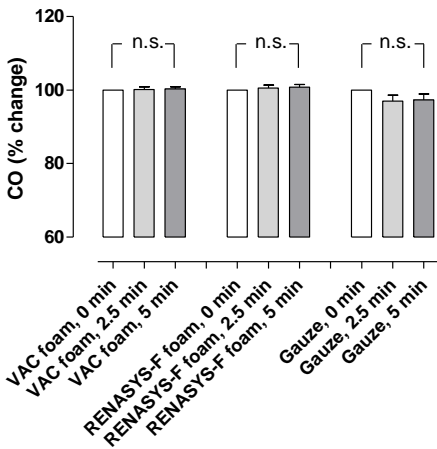

### Heart frequency

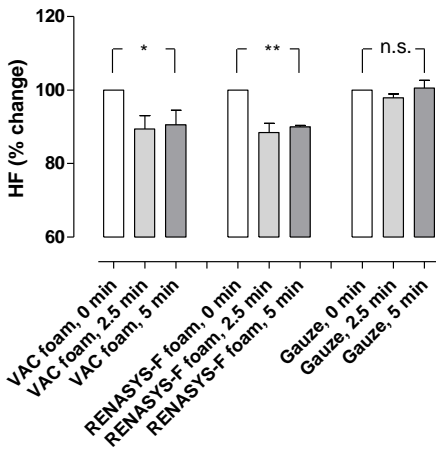

### Mean systemic arterial pressure

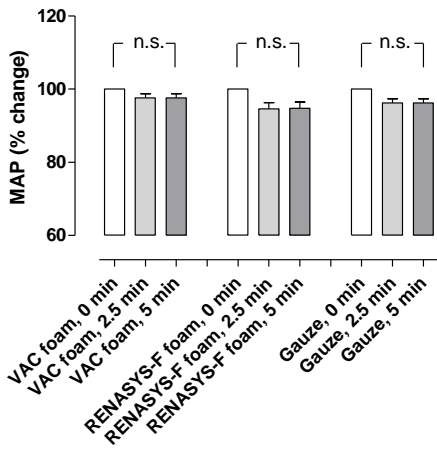

### Mean pulmonary artery pressure

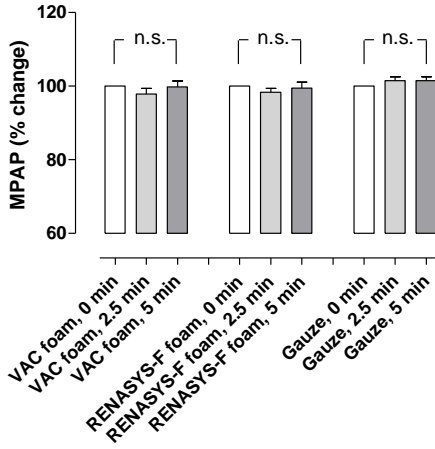

Supplement: MOESM1 [file 9638634]
